# Supplementary material for: Heparin Nebulization Attenuates Bleomycin-Induced Pulmonary Fibrosis through the Coagulation Activation Pathway: A Metabolomics Study
Source: Research Square preprint supplement (doi:10.21203/rs.3.rs-7571251/v1), 2025-12-13
Supplement: Supplementary file 1 [file 4977dadb54a0410fe2998be7.xlsx]

## Sheet: 表1，生物标志物
Differential Endogenous Metabolites Identified Between Heparin and Saline Groups
	Description	m/z & RT	AUC	p-value	Fold Change (log)	KEGG ID	HMDB ID	Adducts	Formula
1	1,2,3-Propanetricarboxylic acid	175.0252/0.82	1	4.77e-08	-0.89	C19806	HMDB0031193	M-H	C6H8O6
2	5-Thymidylic acid	336.072/0.87	1	3.48e-09	-1.1	C00364	HMDB0001227	M-H	C10H15N2O8P
3	AICAR	337.0513/0.78	0.98	7.45e-08	-1.76	C04677	HMDB0001517	M-H	C9H15N4O8P
4	Acetyl-N-formyl-5-methoxykynurenamine	265.1159/3.25	0.98	1.92e-10	3.93	C05642	HMDB0004259	M+H	C13H16N2O4
5	Nicotinic acid ribonucleoside	255.0765/0.76	0.97	6.81e-08	-1.35	C05841	HMDB0006809	M-H	C11H14NO6
6	Flavin mononucleotide	455.0959/0.77	0.97	1.63e-06	-3.28	C00061	HMDB0001520	M-H	C17H21N4O9P
7	Taurocholic acid	516.3058/3.25	0.95	1.86e-10	1.41	C05122	HMDB0000036	M+H	C26H45NO7S
8	11-Dehydrocorticosterone	345.2048/1.16	0.95	1.73e-09	-1.32	C05490	HMDB0004029	M+H	C21H28O4
9	LysoPC(16:1(9Z)/0:0)	494.324/3.28	0.94	6.5e-10	1.22	C04230	HMDB0010383	M+H	C24H48NO7P
10	Palmitoleic acid	253.2178/3.32	0.94	6.48e-09	1.39	C08362	HMDB0003229	M-H	C16H30O2
11	Tetrahydrocortisone	363.2182/1.2	0.94	0.00374933	-2.82	C05470	HMDB0000903	M-H	C21H32O5
12	4,6-Dihydroxyquinoline	160.0409/0.87	0.94	2.03e-05	-0.83	C05639	HMDB0004077	M-H	C9H7NO2
13	Deoxycholic acid	391.2847/1.61	0.91	4.34e-06	-0.91	C04483	HMDB0000626	M-H	C24H40O4
14	Dihydrothymine	129.0676/0.08	0.89	0.000223873	1.37	C00906	HMDB0000079	M+H	C5H8N2O2
15	2-Furoic acid	111.0093/0.8	0.88	0.000138373	-0.71	C01546	HMDB0000617	M-H	C5H4O3
16	PIP(16:2(9Z,12Z)/18:0)	913.4814/0.96	0.88	3.94e-06	-2.83	C00626	HMDB0009944	M-H	C43H80O16P2
17	(N-acetylneuraminosyl(a2-6)lactosamine)	673.2201/3.32	0.87	2.85e-05	1.14	C04886	HMDB0001081	M-H	C25H42N2O19
18	Butyrylcarnitine	232.1545/0.79	0.86	0.000309983	0.68	C02862	HMDB0002013	M+H	C11H21NO4
19	m-Cresol	107.0508/0.77	0.86	0.0010143	-1.5	C01467	HMDB0002048	M-H	C7H8O
20	Sulfate	98.9734/4.79	0.85	0.124312	-0.67	C00059	HMDB0001448	M+H	H2O4S
21	Biliverdin	581.2383/1.64	0.85	0.000205008	-1	C00500	HMDB0001008	M-H	C33H34N4O6
22	PC(18:0/22:6(4Z,7Z,10Z,13Z,16Z,19Z))	834.5355/4.6	0.85	0.000710549	-0.95	C00157	HMDB0008057	M+H	C48H84NO8P
23	PE(22:4(7Z,10Z,13Z,16Z)/P-18:1(11Z))	776.5456/4.33	0.85	0.0034812	1.08	C00350	HMDB0009611	M-H	C45H80NO7P
24	Stearic acid	283.2641/4.12	0.85	0.00433147	-0.74	C01530	HMDB0000827	M-H	C18H36O2
25	Citric acid	191.0202/0.8	0.84	0.000487903	-0.62	C00158	HMDB0000094	M-H	C6H8O7
26	Glycerophosphocholine	256.0981/0.77	0.84	0.000492523	-0.78	C00670	HMDB0000086	M-H	C8H20NO6P
27	N2-Methylguanine	166.0737/0.96	0.83	0.000206897	0.77	C04153	HMDB0006040	M+H	C6H7N5O
28	Gentisic acid	153.0202/0.77	0.81	0.000269825	-1.13	C00628	HMDB0000152	M-H	C7H6O4
29	Hippuric acid	178.0516/0.84	0.81	0.000266805	-0.89	C01586	HMDB0000714	M-H	C9H9NO3
30	Aldosterone	359.1817/1.22	0.8	0.00254402	-0.97	C01780	HMDB0000037	M-H	C21H28O5
31	N2-gamma-Glutamylglutamine	274.1093/0.91	0.79	0.00401552	-0.85	C05283	HMDB0011738	M-H	C10H17N3O6
32	Taurolithocholic acid 3-sulfate	562.2604/2.43	0.79	0.00212729	-1.01	C03642	HMDB0002580	M-H	C26H45NO8S2
33	Lithocholic acid glycine conjugate	432.3168/3.4	0.78	0.0160279	-2.73	C15557	HMDB0000698	M-H	C26H43NO4
34	Deoxyribose	135.0673/1.32	0.78	0.00450788	-0.67	C01801	HMDB0003224	M+H	C5H10O4
35	2-Biphenylol	169.064/0.77	0.78	0.00112475	-0.98	C02499	HMDB0032582	M-H	C12H10O
36	Cholic acid	407.28/3.05	0.78	0.00228143	-0.88	C00695	HMDB0000619	M-H	C24H40O5
37	Nonadecanoic acid	297.2793/4.18	0.78	0.0170425	-0.68	C16535	HMDB0000772	M-H	C19H38O2
38	5-Aminopentanoic acid	116.0727/0.74	0.77	0.0163301	0.59	C00431	HMDB0003355	M-H	C5H11NO2
39	SM(d18:1/20:0)	759.6393/4.3	0.77	0.00982805	-1.86	C00550	HMDB0012102	M+H	C43H87N2O6P
40	Testosterone glucuronide	463.2265/1.82	0.77	0.00431169	-1.09	C11134	HMDB0003193	M-H	C25H36O8
41	Lignans	413.1316/0.91	0.77	0.00220574	-0.78	C10871	HMDB0031452	M-H	C22H22O8
42	Biocytin	373.191/1.92	0.75	0.00344756	-0.64	C05552	HMDB0003134	M+H	C16H28N4O4S
